# Supplementary material for: Evaluating a multicomponent survivorship programme for men with prostate cancer in Australia: a single cohort study
Source: HighWire-hosted journal article supplement (doi:10.1136/bmjopen-2021-049802), 2022-02-01
Supplement: bmjopen-2021-049802supp001_data_supplement.pdf [file bmjopen-2021-049802supp001_data_supplement.pdf]

**Appendix 1. Numbers and proportions of men (n=142) using TrueNTH services by care pathway**

| TrueNTH services      | Active surveillance<br>(n=16) | Radiation<br>(n=6) | Surgery<br>(n=28) | Treatment<br>completed (n=58) | Advanced disease<br>(n=34) |
|-----------------------|-------------------------------|--------------------|-------------------|-------------------------------|----------------------------|
| Nutrition support     | 11 (69)                       | 2 (33)             | 15 (54)           | 31 (53)                       | 21 (62)                    |
| Exercise prescription | 8 (50)                        | 3 (50)             | 14 (50)           | 42 (72)                       | 22 (65)                    |
| Psychosocial support  | 1 (6)                         | 0 (0)              | 3 (11)            | 8 (14)                        | 3 (9)                      |
| Sexual health         | 0 (0)                         | 0 (0)              | 4 (14)            | 6 (10)                        | 0 (0)                      |
| Continence support    | 0 (0)                         | 0 (0)              | 2 (7)             | 6 (10)                        | 1 (3)                      |

### Appendix 2. Psychological distress and weekly leisure-time activity of men (n=142) by care pathway

|                                                | Time point | All men (n=142) |                | Active surveillance (n=16) |                | Radiation (n=6) |                | Surgery (n=28) |                | Treatment completed (n=58) |                       | Advanced disease (n=34) |                |
|------------------------------------------------|------------|-----------------|----------------|----------------------------|----------------|-----------------|----------------|----------------|----------------|----------------------------|-----------------------|-------------------------|----------------|
|                                                |            | n               | Mean (SD)      | n                          | Mean (SD)      | n               | Mean (SD)      | n              | Mean (SD)      | n                          | Mean (SD)             | n                       | Mean (SD)      |
| Total GHQ score                                | T0         | 125             | 2.3 (3.3)      | 16                         | 0.3 (1.0)      | 4               | 0.8 (1.0)      | 24             | 2.8 (2.6)      | 52                         | 2.1 (3.6)             | 29                      | 3.5 (3.8)      |
|                                                | T2         | 99              | 2.0 (3.2)      | 13                         | 0.9 (1.6)      | 3               | 0.0 (0.0)      | 18             | 2.1 (3.0)      | 42                         | 1.9 (3.2)             | 23                      | 3.1 (3.8)      |
|                                                | T4         | 92              | 1.9 (3.1)      | 13                         | 0.4 (1.1)      | 2               | 0.0 (0.0)      | 16             | 1.4 (2.6)      | 37                         | 2.1 (3.4)             | 22                      | 2.8 (3.6)      |
| Change over time                               |            | 79              | <i>p</i> =0.10 | 11                         | <i>p</i> =0.31 | 2               | <i>p</i> =0.50 | 14             | <i>p</i> =0.11 | 33                         | <i>p</i> =0.24        | 19                      | <i>p</i> =0.14 |
| Total weekly leisure-time activity score (LSI) | T0         | 119             | 31.1 (28.9)    | 16                         | 36.4 (22.1)    | 4               | 58.8 (31.1)    | 24             | 34.6 (33.9)    | 50                         | 28.9 (26.9)           | 25                      | 24.2 (29.7)    |
|                                                | T2         | 93              | 39.5 (49.0)    | 13                         | 37.2 (24.8)    | 3               | 79.7 (30.4)    | 16             | 30.7 (30.6)    | 39                         | 50.4 (68.0)           | 22                      | 22.6 (14.6)    |
|                                                | T4         | 89              | 37.9 (35.4)    | 13                         | 37.9 (19.2)    | 2               | 48.5 (20.5)    | 16             | 36.8 (35.7)    | 35                         | 42.0 (44.8)           | 23                      | 31.7 (27.2)    |
| Change over time                               |            | 72              | <i>p</i> =0.08 | 11                         | <i>p</i> =0.36 | 2               | <i>p</i> =0.47 | 14             | <i>p</i> =0.82 | 30                         | <b><i>p</i>=0.046</b> | 15                      | <i>p</i> =0.46 |

Notes: T0 = at enrolment, T2 = 6 months following enrolment, T4 = 12 months following enrolment.

Total GHQ mean score ranges from 0 to 12; a higher score indicates a greater severity of psychological distress.

A higher LSI scores means a higher level of leisure-time activity.

### Appendix 3. Proportion of men (n=142) reporting satisfactory experience of the health care system during diagnosis and treatment

| Domain                                                     | Measures                                                                         | T0        |         | T2 |         | T4 |         | Change over time |           |
|------------------------------------------------------------|----------------------------------------------------------------------------------|-----------|---------|----|---------|----|---------|------------------|-----------|
|                                                            |                                                                                  | n         | n (%)   | n  | n (%)   | n  | n (%)   | n                | test      |
|                                                            |                                                                                  | Diagnosis |         |    |         |    |         | n                | test      |
| Information, communication & education                     | Completely understood the diagnosis                                              | 121       | 93 (77) | 96 | 71 (74) | 86 | 68 (79) | 69               | $p=0.52$  |
|                                                            | Were given written information about the diagnosis and it was easy to understand | 122       | 68 (56) | 96 | 57 (59) | 89 | 57 (64) | 54               | $p=0.63$  |
|                                                            |                                                                                  | Treatment |         |    |         |    |         | n                | test      |
| Coordination, integration of care, continuity & transition | Were offered a written assessment & care plan                                    | 121       | 33 (27) | 97 | 33 (34) | 89 | 35 (39) | 37               | $p=0.047$ |
|                                                            | Were given the name of a Clinical Nurse Specialist for treatment support         | 121       | 54 (45) | 95 | 50 (53) | 90 | 47 (52) | 55               | $p=0.21$  |
| Respect for patients' preferences                          | Adequate involvement in decisions about care & treatment                         | 122       | 69 (57) | 97 | 61 (63) | 90 | 53 (59) | 72               | $p=0.10$  |
|                                                            | Patients' views were taken into account during treatment                         | 119       | 61 (51) | 94 | 57 (61) | 90 | 47 (52) | 57               | $p=0.19$  |
| Information, communication & education                     | The possible side effects of treatments were explained in an understandable way  | 121       | 65 (54) | 97 | 60 (62) | 90 | 51 (57) | 71               | $p=0.40$  |
|                                                            | Were given written information about the side effects of treatments              | 118       | 76 (64) | 93 | 54 (58) | 87 | 46 (53) | 54               | $p=0.63$  |

Notes: T0 = at enrolment, T2 = 6 months following enrolment, T4 = 12 months following enrolment.
